# Supplementary material
Source: publisher site journal article supplement (http://e-cmh.org/upload/media/cmh-2022-0039-suppl4.pdf)
Supplement: Supplementary file 1 [file cmh-2022-0039-suppl4.pdf]

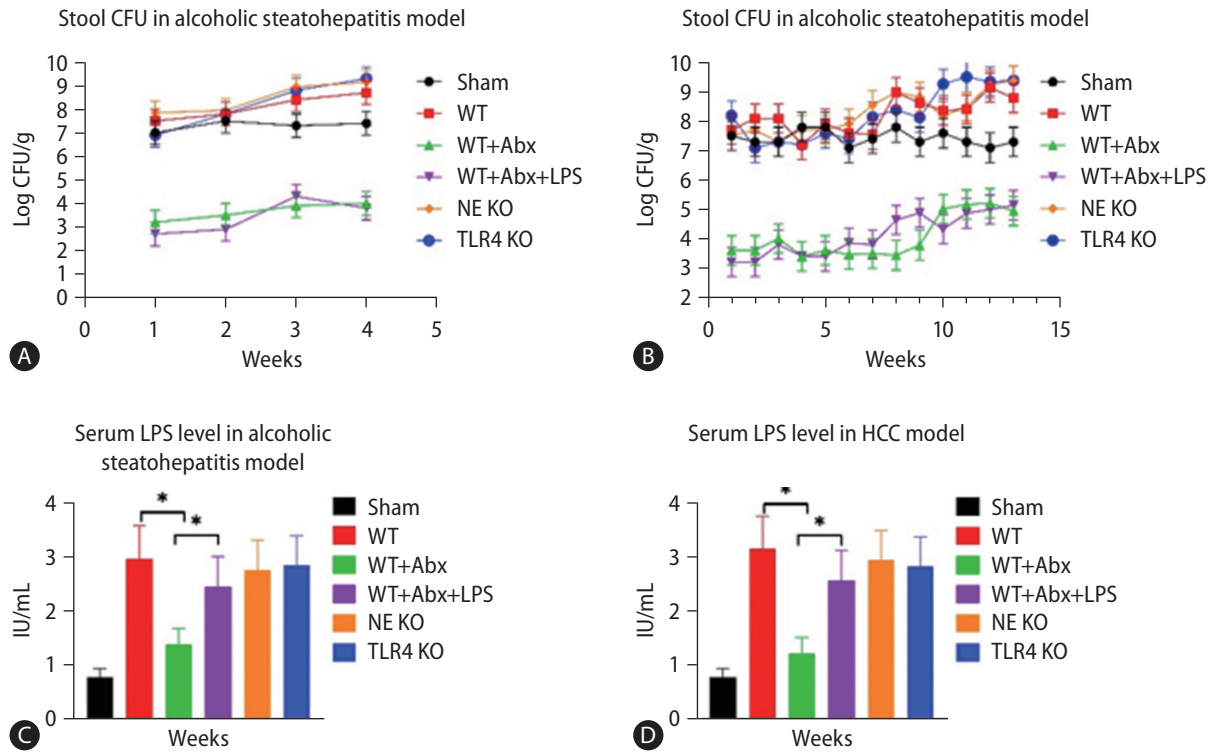

**Supplementary Figure 2.** Stool bacteria and serum lipopolysaccharide (LPS) levels in both alcoholic hepatosteatosis and hepatocellular carcinoma (HCC) mice. (A, B) Stool CFU was tested every week in the mouse models of alcoholic hepatosteatosis and HCC. (C, D) Serum LPS was tested after euthanization in a mouse model of alcoholic hepatosteatosis and HCC model. CFU, colony forming unit; WT, wild type; Abx, antibiotics; NE, neutrophil elastase; KO, knockout; TLR, toll-like receptor. \* $P < 0.05$  compared between groups (5–8 mice per experimental group).
